# Supplementary material
Source: PubMed Central journal article supplement (PMC5389958)
Supplement: mmc1.pdf [file mmc1.pdf]

**Biophysical Journal, Volume 112**

**Supplemental Information**

**The Closed State of the Thin Filament Is Not Occupied in Fully Activated  
Skeletal Muscle**

**Sergey Y. Bershitsky, Natalia A. Koubassova, Michael A. Ferenczi, Galina V.  
Kopylova, Theyencheri Narayanan, and Andrey K. Tsaturyan**

## ONLINE SUPPORTING MATERIAL

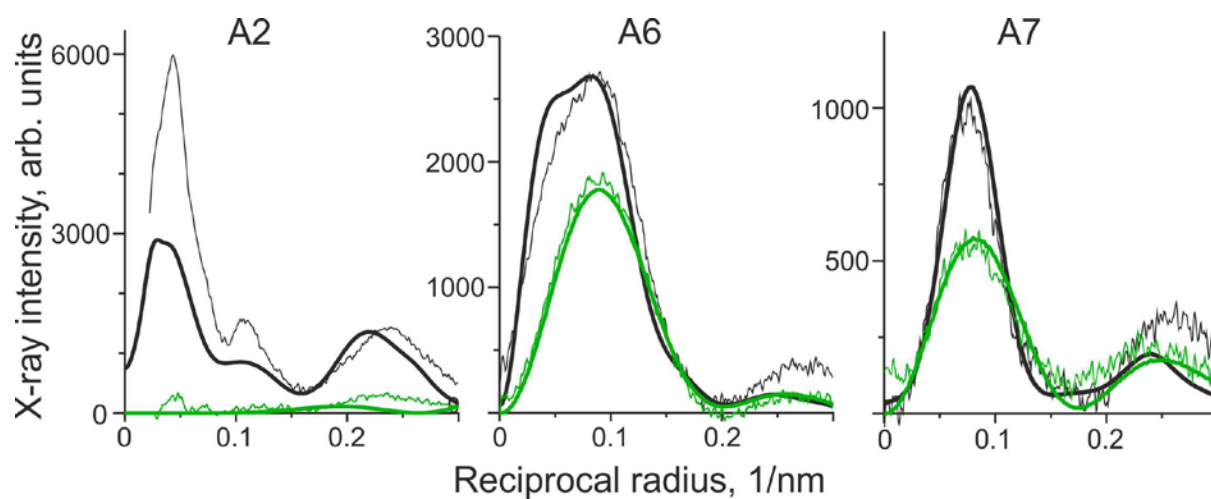

Figure S1. Experimental (thin lines) and model (bold lines) profiles of the A2, A6, A7 actin lines in relaxed (green) and rigor (black) states. Intensity calculations have been performed as described in Material and Methods. In the model of the relaxed state thin filaments were considered to be in the B-state, for the rigor model Tpm molecules in the overlap zone of sarcomeres were in the O-state, while in the non-overlap zone Tpm remained in the C-state. The same experimental data from permeabilized muscle fibers from the rabbit as described by Koubassova et al. (2016) were plotted against reciprocal radial coordinates. Calculated intensities were multiplied by a single scaling factor for all three layer lines: A2, A6 and A7.
